# Supplementary material for: Dengue Specific Immunoglobulin A Antibody is Present in Urine and Associated with Disease Severity
Source: PubMed Central journal article supplement (PMC4890044; doi:10.1038/srep27298), 2016-06-02
Supplement: srep27298-s1.pdf [file srep27298-s1.pdf]

## Dengue Specific Immunoglobulin A Antibody was Present in Urine and Associated with Disease Severity

Hui Zhao, Shuang Qiu, Wen-Xin Hong, Ke-Yu Song, Jian Wang, Hui-Qin Yang, Yong-Qiang Deng, Shun-Ya Zhu, Fu-Chun Zhang, Cheng-Feng Qin

TABLE S1 Results of IgA detection in urine samples.

| <b>Patient no.</b> | <b>Age (year)</b> | <b>Gender</b> | <b>Classification</b> | <b>Days after onset of illness</b> | <b>Serotype</b> | <b>Infection type</b> | <b>AKI</b> | <b>IgA (intensity scale)</b> |
|--------------------|-------------------|---------------|-----------------------|------------------------------------|-----------------|-----------------------|------------|------------------------------|
| 1                  | 23                | M             | DF                    | 5                                  | DENV-1          | Primary               | +          | -                            |
|                    |                   |               |                       | 7                                  |                 |                       |            | -                            |
|                    |                   |               |                       | 8                                  |                 |                       |            | -                            |
|                    |                   |               |                       | 10                                 |                 |                       |            | -                            |
| 2                  | 41                | M             | DF                    | 4                                  | -               | Primary               | -          | -                            |

---

|   |    |   |    |   |        |         |   |     |
|---|----|---|----|---|--------|---------|---|-----|
| 3 | 55 | M | DF | 4 | DENV-1 | Primary | + | -   |
|   |    |   |    | 7 |        |         |   | -   |
| 4 | 38 | M | DF | 6 | DENV-1 | Primary | - | -   |
| 5 | 43 | M | DF | 1 | DENV-1 | Primary | - | -   |
|   |    |   |    | 4 |        |         |   | 0.2 |
|   |    |   |    | 6 |        |         |   | -   |
|   |    |   |    | 8 |        |         |   | -   |
| 6 | 74 | M | DF | 5 | DENV-1 | Primary | + | -   |
|   |    |   |    | 7 |        |         |   | -   |
|   |    |   |    | 9 |        |         |   | -   |
| 7 | 30 | M | DF | 3 | DENV-1 | Primary | - | -   |
| 8 | 34 | M | DF | 7 | DENV-1 | Primary | - | 3   |
| 9 | 21 | M | DF | 6 | DENV-2 | Primary | - | -   |

---

---

|    |    |   |    |   |        |         |   |   |   |
|----|----|---|----|---|--------|---------|---|---|---|
|    |    |   |    | 8 |        |         |   |   | - |
| 10 | 22 | M | DF | 5 | DENV-1 | Primary | - | - | - |
| 11 | 27 | M | DF | 5 | DENV-1 | Primary | - | - | - |
| 12 | 42 | F | DF | 5 | DENV-1 | Primary | - | - | - |
|    |    |   |    | 6 |        |         |   |   | - |
| 13 | 18 | M | DF | 4 | DENV-1 | Primary | - | - | - |
| 14 | 42 | F | DF | 5 | DENV-1 | Primary | - | - | 1 |
| 15 | 36 | M | DF | 4 | DENV-1 | Primary | - | - | - |
| 16 | 27 | M | DF | 5 | DENV-1 | Primary | - | - | - |
| 17 | 25 | F | DF | 5 | DENV-1 | Primary | - | - | - |
| 18 | 26 | M | DF | 5 | DENV-1 | Primary | - | - | - |
| 19 | 16 | M | DF | 5 | DENV-1 | Primary | - | - | 2 |
| 20 | 58 | M | DF | 5 | DENV-1 | Primary | + | - | - |

---

---

|    |    |   |    |   |        |           |   |     |
|----|----|---|----|---|--------|-----------|---|-----|
|    |    |   |    | 6 |        |           |   | -   |
|    |    |   |    | 8 |        |           |   | 1   |
|    |    |   |    | 9 |        |           |   | 2   |
| 21 | 15 | F | DF | 5 | DENV-1 | Primary   | - | -   |
|    |    |   |    | 7 |        |           |   | -   |
|    |    |   |    | 8 |        |           |   | -   |
| 22 | 30 | M | DF | 4 | DENV-1 | Primary   | - | -   |
|    |    |   |    | 5 |        |           |   | -   |
|    |    |   |    | 6 |        |           |   | -   |
|    |    |   |    | 7 |        |           |   | -   |
| 23 | 23 | M | DF | 5 | DENV-1 | Secondary | - | -   |
|    |    |   |    | 6 |        |           |   | 0.5 |
|    |    |   |    | 7 |        |           |   | 0.5 |

---

---

|    |    |   |    |    |        |         |   |     |
|----|----|---|----|----|--------|---------|---|-----|
|    |    |   |    | 8  |        |         |   | 0.2 |
|    |    |   |    | 9  |        |         |   | 1   |
|    |    |   |    | 10 |        |         |   | -   |
|    |    |   |    | 11 |        |         |   | 0.5 |
|    |    |   |    | 12 |        |         |   | -   |
|    |    |   |    | 13 |        |         |   | -   |
|    |    |   |    | 14 |        |         |   | -   |
| 24 | 40 | M | DF | 4  | DENV-1 | Primary | - | -   |
|    |    |   |    | 6  |        |         |   | -   |
|    |    |   |    | 7  |        |         |   | -   |
|    |    |   |    | 8  |        |         |   | 2   |
| 25 | 34 | F | DF | 5  | -      | Primary | + | -   |
| 26 | 47 | F | DF | 5  | DENV-1 | Primary | - | -   |

---

---

|    |    |   |    |   |        |         |   |     |
|----|----|---|----|---|--------|---------|---|-----|
|    |    |   |    | 6 |        |         |   | 0.2 |
|    |    |   |    | 7 |        |         |   | 1   |
|    |    |   |    | 8 |        |         |   | 2   |
| 27 | 42 | F | DF | 3 | DENV-1 | Primary | + | 2   |
|    |    |   |    | 4 |        |         |   | 2   |
|    |    |   |    | 5 |        |         |   | -   |
|    |    |   |    | 6 |        |         |   | -   |
|    |    |   |    | 7 |        |         |   | 1   |
|    |    |   |    | 8 |        |         |   | 2   |
| 28 | 23 | M | DF | 5 | DENV-1 | Primary | - | -   |
|    |    |   |    | 6 |        |         |   | -   |
|    |    |   |    | 7 |        |         |   | -   |
|    |    |   |    | 8 |        |         |   | -   |

---

---

|    |    |   |    |    |        |         |   |     |
|----|----|---|----|----|--------|---------|---|-----|
|    |    |   |    | 9  |        |         |   | -   |
|    |    |   |    | 10 |        |         |   | -   |
|    |    |   |    | 11 |        |         |   | 0.2 |
|    |    |   |    | 12 |        |         |   | 0.5 |
| 29 | 63 | M | DF | 5  | DENV-2 | Primary | + | -   |
|    |    |   |    | 6  |        |         |   | -   |
|    |    |   |    | 7  |        |         |   | -   |
|    |    |   |    | 8  |        |         |   | 0.5 |
|    |    |   |    | 9  |        |         |   | 1   |
| 30 | 38 | M | DF | 4  | DENV-1 | Primary | - | -   |
|    |    |   |    | 5  |        |         |   | -   |
|    |    |   |    | 6  |        |         |   | -   |
|    |    |   |    | 7  |        |         |   | 0.5 |

---

---

|    |    |   |    |    |        |         |   |     |
|----|----|---|----|----|--------|---------|---|-----|
|    |    |   |    | 8  |        |         |   | 1   |
|    |    |   |    | 9  |        |         |   | 0.5 |
|    |    |   |    | 10 |        |         |   | -   |
|    |    |   |    | 11 |        |         |   | -   |
|    |    |   |    | 12 |        |         |   | -   |
| 31 | 24 | F | DF | 4  | DENV-1 | Primary | - | -   |
|    |    |   |    | 5  |        |         |   | -   |
|    |    |   |    | 7  |        |         |   | -   |
| 32 | 61 | F | DF | 5  | DENV-1 | Primary | + | 2   |
|    |    |   |    | 6  |        |         |   | -   |
|    |    |   |    | 7  |        |         |   | -   |
|    |    |   |    | 8  |        |         |   | -   |
|    |    |   |    | 9  |        |         |   | -   |

---



---

|    |    |   |    |    |        |           |   |     |
|----|----|---|----|----|--------|-----------|---|-----|
|    |    |   |    | 11 |        |           |   | 0.2 |
|    |    |   |    | 12 |        |           |   | 0.2 |
| 33 | 16 | M | DF | 5  | DENV-1 | Primary   | - | -   |
|    |    |   |    | 6  |        |           |   | -   |
|    |    |   |    | 7  |        |           |   | -   |
|    |    |   |    | 8  |        |           |   | -   |
| 34 | 60 | F | DF | 10 | DENV-4 | Primary   | + | 0.2 |
| 35 | 56 | M | DF | 3  | DENV-3 | Secondary | + | -   |
|    |    |   |    | 5  |        |           |   | -   |
| 36 | 32 | M | DF | 6  | DENV-4 | Primary   | - | -   |
|    |    |   |    | 7  |        |           |   | 0.5 |
| 37 | 71 | F | DF | 7  | DENV-4 | Secondary | + | -   |
| 38 | 46 | M | DF | 4  | DENV-4 | Secondary | - | 0.2 |

---

---

|    |    |   |    |    |        |           |   |     |
|----|----|---|----|----|--------|-----------|---|-----|
|    |    |   |    | 5  |        |           |   | 0.2 |
|    |    |   |    | 6  |        |           |   | -   |
|    |    |   |    | 7  |        |           |   | -   |
|    |    |   |    | 8  |        |           |   | 0.5 |
| 39 | 39 | F | DF | 9  | DENV-1 | Secondary | - | 0.5 |
|    |    |   |    | 12 |        |           |   | -   |
| 40 | 24 | F | DF | 10 | DENV-3 | Secondary | - | -   |
|    |    |   |    | 11 |        |           |   | -   |
|    |    |   |    | 12 |        |           |   | -   |
|    |    |   |    | 13 |        |           |   | -   |
|    |    |   |    | 14 |        |           |   | -   |
| 41 | 36 | M | DF | 7  | DENV-3 | Primary   | - | -   |
|    |    |   |    | 8  |        |           |   | -   |

---

---

|    |    |   |    |    |        |           |   |     |
|----|----|---|----|----|--------|-----------|---|-----|
| 42 | 45 | M | SD | 6  | DENV-1 | Primary   | - | -   |
| 43 | 69 | F | SD | 9  | DENV-1 | Secondary | + | 3   |
| 44 | 45 | M | SD | 8  | -      | Secondary | - | 0.2 |
| 45 | 45 | F | SD | 6  | -      | Primary   | - | -   |
| 46 | 39 | M | SD | 7  | DENV-1 | Secondary | - | -   |
|    |    |   |    | 10 |        |           |   | 1   |
| 47 | 35 | M | SD | 5  | DENV-1 | Primary   | - | -   |
|    |    |   |    | 6  |        |           |   | -   |
|    |    |   |    | 8  |        |           |   | 0.2 |
| 48 | 28 | M | SD | 6  | DENV-1 | Secondary | + | 0.2 |
| 49 | 72 | F | SD | 3  | DENV-1 | Primary   | + | -   |
| 50 | 33 | F | SD | 4  | DENV-1 | Primary   | - | 2   |
| 51 | 26 | M | SD | 5  | DENV-1 | Secondary | - | -   |

---

---

|    |    |   |    |    |        |         |   |     |
|----|----|---|----|----|--------|---------|---|-----|
|    |    |   |    | 6  |        |         |   | 0.2 |
|    |    |   |    | 7  |        |         |   | 0.5 |
|    |    |   |    | 8  |        |         |   | 0.5 |
| 52 | 40 | M | SD | 4  | DENV-1 | Primary | + | 0.2 |
|    |    |   |    | 5  |        |         |   | -   |
|    |    |   |    | 6  |        |         |   | -   |
|    |    |   |    | 7  |        |         |   | 0.5 |
|    |    |   |    | 8  |        |         |   | -   |
|    |    |   |    | 9  |        |         |   | -   |
|    |    |   |    | 10 |        |         |   | 0.2 |
|    |    |   |    | 11 |        |         |   | 0.2 |
|    |    |   |    | 12 |        |         |   | 0.5 |
| 53 | 60 | F | SD | 3  | DENV-1 | Primary | + | 0.5 |

---

---

|    |    |   |    |    |        |           |   |     |
|----|----|---|----|----|--------|-----------|---|-----|
|    |    |   |    | 5  |        |           |   | -   |
|    |    |   |    | 6  |        |           |   | -   |
|    |    |   |    | 7  |        |           |   | 1   |
|    |    |   |    | 9  |        |           |   | 1   |
|    |    |   |    | 10 |        |           |   | 0.5 |
|    |    |   |    | 11 |        |           |   | -   |
|    |    |   |    | 12 |        |           |   | -   |
|    |    |   |    | 13 |        |           |   | 0.2 |
|    |    |   |    | 14 |        |           |   | 1   |
| 54 | 61 | F | SD | 6  | DENV-1 | Secondary | - | 3   |
| 55 | 70 | F | SD | 5  | DENV-1 | Primary   | - | 1   |
| 56 | 74 | F | SD | 8  | -      | Secondary | + | 0.2 |
|    |    |   |    | 9  |        |           |   | 0.2 |

---

---

|    |    |   |    |    |        |           |   |     |
|----|----|---|----|----|--------|-----------|---|-----|
|    |    |   |    | 10 |        |           |   | 0.5 |
|    |    |   |    | 11 |        |           |   | 0.5 |
| 57 | 59 | F | DF | 3  | DENV-1 | Secondary | - | -   |
|    |    |   |    | 4  |        |           |   | -   |
|    |    |   |    | 5  |        |           |   | 1.0 |
|    |    |   |    | 6  |        |           |   | 2.0 |
|    |    |   |    | 7  |        |           |   | 3.0 |
|    |    |   |    | 8  |        |           |   | 3.0 |
| 58 | 19 | M | DF | 3  | DENV-1 | Primary   | - | -   |
|    |    |   |    | 4  |        |           |   | -   |
|    |    |   |    | 5  |        |           |   | -   |
| 59 | 49 | M | DF | 1  | DENV-2 | Primary   | - | -   |
|    |    |   |    | 2  |        |           |   | -   |

---

---

|    |    |   |    |   |        |           |   |     |
|----|----|---|----|---|--------|-----------|---|-----|
|    |    |   |    | 3 |        |           |   | -   |
| 60 | 30 | F | DF | 3 | DENV-1 | Primary   | - | 0.2 |
|    |    |   |    | 4 |        |           |   | -   |
|    |    |   |    | 5 |        |           |   | -   |
|    |    |   |    | 6 |        |           |   | -   |
| 61 | 78 | F | DF | 2 | DENV-1 | Secondary | - | -   |
|    |    |   |    | 3 |        |           |   | -   |
|    |    |   |    | 4 |        |           |   | -   |
|    |    |   |    | 5 |        |           |   | -   |
|    |    |   |    | 6 |        |           |   | 0.2 |
|    |    |   |    | 7 |        |           |   | 1.0 |
|    |    |   |    | 8 |        |           |   | 1.0 |
| 62 | 46 | M | DF | 3 | DENV-1 | Primary   | - | -   |

---

---

|    |    |   |    |   |        |         |   |     |
|----|----|---|----|---|--------|---------|---|-----|
|    |    |   |    | 4 |        |         |   | -   |
|    |    |   |    | 5 |        |         |   | -   |
|    |    |   |    | 6 |        |         |   | -   |
|    |    |   |    | 7 |        |         |   | -   |
|    |    |   |    | 8 |        |         |   | 0.5 |
| 63 | 30 | M | DF | 3 | DENV-1 | Primary | - | -   |
|    |    |   |    | 4 |        |         |   | -   |
| 64 | 27 | M | DF | 3 | DENV-1 | Primary | - | -   |
| 65 | 88 | F | SD | 2 | DENV-2 | Primary | + | -   |
|    |    |   |    | 8 |        |         |   | 3.0 |
| 66 | 34 | M | DF | 2 | DENV-1 | Primary | - | -   |
|    |    |   |    | 3 |        |         |   | -   |
|    |    |   |    | 4 |        |         |   | -   |

---



---

|    |    |   |    |   |        |           |   |     |
|----|----|---|----|---|--------|-----------|---|-----|
|    |    |   |    | 7 |        |           |   | -   |
| 67 | 26 | F | DF | 1 | DENV-1 | Primary   | - | -   |
|    |    |   |    | 2 |        |           |   | -   |
| 68 | 73 | M | DF | 3 | DENV-1 | Primary   | - | -   |
|    |    |   |    | 4 |        |           |   | -   |
|    |    |   |    | 5 |        |           |   | -   |
|    |    |   |    | 7 |        |           |   | 0.2 |
|    |    |   |    | 8 |        |           |   | 1.0 |
| 69 | 66 | M | DF | 2 | DENV-1 | Primary   | - | 0.2 |
|    |    |   |    | 3 |        |           |   | -   |
|    |    |   |    | 4 |        |           |   | -   |
|    |    |   |    | 5 |        |           |   | 0.2 |
| 70 | 85 | F | SD | 5 | DENV-1 | Secondary | + | 0.2 |

---

---

|    |    |   |    |    |        |           |   |     |
|----|----|---|----|----|--------|-----------|---|-----|
|    |    |   |    | 6  |        |           |   | 0.2 |
|    |    |   |    | 7  |        |           |   | 0.5 |
|    |    |   |    | 8  |        |           |   | 0.5 |
|    |    |   |    | 9  |        |           |   | 0.5 |
| 71 | 76 | M | SD | 5  | DENV-1 | Secondary | + | 0.2 |
|    |    |   |    | 6  |        |           |   | 1   |
|    |    |   |    | 8  |        |           |   | 3   |
|    |    |   |    | 9  |        |           |   | 3   |
|    |    |   |    | 10 |        |           |   | 3   |
|    |    |   |    | 12 |        |           |   | 3   |
|    |    |   |    | 14 |        |           |   | 3   |
| 72 | 78 | M | SD | 7  | DENV-1 | Secondary | + | 3   |
|    |    |   |    | 9  |        |           |   | 3   |

---

---

|    |    |   |    |    |        |           |   |     |
|----|----|---|----|----|--------|-----------|---|-----|
|    |    |   |    | 10 |        |           |   | 3   |
|    |    |   |    | 11 |        |           |   | 3   |
|    |    |   |    | 12 |        |           |   | 3   |
|    |    |   |    | 13 |        |           |   | 3   |
| 73 | 58 | M | SD | 6  | DENV-1 | Secondary | + | 0.2 |
|    |    |   |    | 7  |        |           |   | 0.5 |
|    |    |   |    | 8  |        |           |   | 1   |
|    |    |   |    | 9  |        |           |   | 1   |
| 74 | 99 | F | SD | 8  | DENV-1 | Secondary | + | 1   |
|    |    |   |    | 9  |        |           |   | 1   |
|    |    |   |    | 11 |        |           |   | 3   |
|    |    |   |    | 12 |        |           |   | 3   |
|    |    |   |    | 14 |        |           |   | 3   |

---

---

|    |    |   |    |    |        |           |   |     |
|----|----|---|----|----|--------|-----------|---|-----|
| 75 | 75 | M | SD | 4  | DENV-1 | Secondary | + | -   |
|    |    |   |    | 5  |        |           |   | -   |
|    |    |   |    | 6  |        |           |   | -   |
|    |    |   |    | 7  |        |           |   | -   |
|    |    |   |    | 8  |        |           |   | 0.2 |
|    |    |   |    | 9  |        |           |   | 0.5 |
|    |    |   |    | 10 |        |           |   | 0.2 |
|    |    |   |    | 11 |        |           |   | 0.5 |
| 76 | 75 | M | SD | 7  | DENV-1 | Primary   | + | 0.5 |
|    |    |   |    | 8  |        |           |   | 0.5 |
|    |    |   |    | 10 |        |           |   | 0.5 |
|    |    |   |    | 11 |        |           |   | 1   |
|    |    |   |    | 12 |        |           |   | 0.5 |

---

---

|    |    |   |    |    |        |           |   |     |
|----|----|---|----|----|--------|-----------|---|-----|
|    |    |   |    | 13 |        |           |   | 0.2 |
| 77 | 85 | M | SD | 7  | DENV-1 | Secondary | + | 3   |
|    |    |   |    | 8  |        |           |   | 3   |
| 78 | 74 | M | SD | 6  | DENV-1 | Primary   | + | -   |
|    |    |   |    | 7  |        |           |   | -   |
|    |    |   |    | 8  |        |           |   | -   |
|    |    |   |    | 9  |        |           |   | -   |
|    |    |   |    | 10 |        |           |   | -   |
|    |    |   |    | 12 |        |           |   | 0.2 |
|    |    |   |    | 14 |        |           |   | 0.5 |

---

**Table S2** | The distribution of patients with dengue fever (DF) or severe dengue (SD) at different time points of the disease.

| <b>No. of days of fever</b> | <b>DF (n=53)</b> | <b>SD (n=25)</b> |
|-----------------------------|------------------|------------------|
|                             | <b>No. (%)</b>   | <b>No. (%)</b>   |
| 1-3                         | 16 (30.2)        | 3 (12)           |
| 4-7                         | 46 (86.8)        | 19 (76)          |
| >7                          | 24 (45.3)        | 18 (72)          |
